# Supplementary material for: A gene signature predicts response to neoadjuvant chemotherapy in triple-negative breast cancer patients
Source: PubMed Central journal article supplement (PMC6509059; doi:10.1042/bsr20190414), 2019-05-10
Supplement: bsr20190414_Supp1.pdf [file bsr20190414_Supp1.pdf]

**Supplementary Table 1. Differentially expressed lncRNAs between pCR and nCR**

| Transcript ID | P.Value  | logFC       |
|---------------|----------|-------------|
| NR_037195.1   | 0.001646 | 0.66594521  |
| NR_145481.1   | 0.002008 | 0.3771513   |
| NR_048561.1   | 0.002099 | 0.47063902  |
| NR_103480.1   | 0.002478 | -0.96602788 |
| NR_130132.1   | 0.002746 | -0.59755152 |
| NR_037914.1   | 0.002781 | 0.80504051  |
| NR_038895.1   | 0.003172 | 0.40920889  |
| NR_037713.1   | 0.003317 | -1.38981506 |
| NR_073461.1   | 0.00424  | 0.73797038  |
| NR_103508.1   | 0.004628 | -0.72553205 |
| NR_158174.1   | 0.005287 | 0.36094143  |
| NR_023392.1   | 0.005303 | -1.21335233 |
| NR_027250.2   | 0.006698 | 0.37605004  |
| NR_121659.1   | 0.007008 | 0.48134803  |
| NR_103726.1   | 0.007309 | -0.61429391 |
| NR_039982.1   | 0.007608 | 0.34748741  |
| NR_130754.1   | 0.008067 | 0.38550038  |
| NR_109949.1   | 0.008194 | 0.42246433  |
| NR_103869.1   | 0.008406 | 0.38574871  |
| NR_028099.1   | 0.008979 | 0.39858454  |
| NR_026598.1   | 0.009234 | -0.61845043 |
| NR_125333.1   | 0.009239 | -0.49917742 |
| NR_049780.1   | 0.009467 | 0.35797878  |
| NR_152815.1   | 0.009562 | -0.81672368 |
| NR_033684.1   | 0.009791 | -0.55448721 |
| NR_104448.1   | 0.010156 | 0.80269984  |
| NR_130136.1   | 0.011524 | -0.6791002  |
| NR_046310.1   | 0.011985 | -0.57519073 |
| NR_110549.1   | 0.012881 | 0.41254028  |
| NR_028024.1   | 0.013036 | -0.6002591  |
| NR_110319.1   | 0.013951 | 0.96596364  |
| NR_047685.1   | 0.014024 | 0.33573129  |
| NR_110105.1   | 0.0148   | -0.49758783 |
| NR_111980.1   | 0.014878 | -0.97023434 |
| NR_016021.1   | 0.015207 | 0.40050022  |
| NR_046172.1   | 0.015861 | -0.80518747 |
| NR_125897.1   | 0.016152 | 0.37449148  |
| NR_045090.1   | 0.016809 | -0.59470172 |
| NR_003272.2   | 0.016915 | -0.72467339 |

|             |          |             |
|-------------|----------|-------------|
| NR_051952.1 | 0.01709  | -0.75193519 |
| NR_037687.1 | 0.017414 | -0.98706298 |
| NR_104103.1 | 0.017429 | -0.44445427 |
| NR_045763.1 | 0.017493 | 0.33457885  |
| NR_104233.1 | 0.017877 | 0.64852787  |
| NR_126093.1 | 0.018178 | 0.33881687  |
| NR_073070.1 | 0.018496 | -1.40308568 |
| NR_003144.1 | 0.01868  | 0.48803401  |
| NR_026752.1 | 0.018842 | -1.09710017 |
| NR_130967.1 | 0.019024 | -0.71930871 |
| NR_037942.1 | 0.019043 | -0.73220245 |
| NR_103469.1 | 0.019068 | 0.49244032  |
| NR_122106.1 | 0.019196 | 0.84785951  |
| NR_102422.1 | 0.019532 | 0.89956661  |
| NR_038375.1 | 0.019739 | 0.31308247  |
| NR_026828.1 | 0.019832 | 0.45625813  |
| NR_052023.1 | 0.019837 | 0.3936943   |
| NR_027668.1 | 0.020088 | -1.20929699 |
| NR_033404.1 | 0.020118 | 0.33074956  |
| NR_036542.1 | 0.020945 | 0.42991695  |
| NR_002947.2 | 0.021492 | 0.35924236  |
| NR_028343.1 | 0.02164  | -0.60454621 |
| NR_103526.1 | 0.021651 | 0.31804748  |
| NR_046331.1 | 0.022059 | 0.44904262  |
| NR_073120.1 | 0.022097 | -0.96092728 |
| NR_027654.1 | 0.022129 | 0.78736399  |
| NR_109978.1 | 0.022231 | 0.41378408  |
| NR_037942.1 | 0.022303 | -0.65535629 |
| NR_003089.1 | 0.022558 | 0.43344103  |
| NR_046395.1 | 0.022595 | 0.58731679  |
| NR_028085.1 | 0.023129 | 0.53590812  |
| NR_110242.1 | 0.023138 | 0.54481266  |
| NR_126500.1 | 0.02374  | 0.31789754  |
| NR_030725.1 | 0.024465 | 0.31818415  |
| NR_073018.1 | 0.024567 | 0.32987689  |
| NR_038135.2 | 0.02501  | 0.34687978  |
| NR_026778.1 | 0.025162 | -0.87285724 |
| NR_111917.1 | 0.025283 | 0.42507015  |
| NR_030737.1 | 0.025404 | -0.93681417 |
| NR_036541.1 | 0.025676 | -0.51350824 |
| NR_040016.1 | 0.02626  | -0.83080858 |
| NR_036510.1 | 0.026365 | 0.79175104  |
| NR_028406.1 | 0.026542 | -0.58927235 |

|             |          |             |
|-------------|----------|-------------|
| NR_102347.1 | 0.027157 | -0.89531198 |
| NR_126036.1 | 0.02784  | -0.33269119 |
| NR_027384.1 | 0.028337 | 0.27601134  |
| NR_028035.2 | 0.029161 | -0.85032547 |
| NR_033302.1 | 0.029245 | -0.74135742 |
| NR_030761.1 | 0.029347 | -0.601602   |
| NR_036505.1 | 0.029981 | 0.32147129  |
| NR_015434.1 | 0.030073 | 0.3389628   |
| NR_027142.1 | 0.030371 | 0.45802125  |
| NR_027032.1 | 0.031328 | 0.41441263  |
| NR_047516.1 | 0.03161  | 0.59636625  |
| NR_037162.1 | 0.031935 | 0.35327812  |
| NR_104244.1 | 0.032882 | 0.58857738  |
| NR_037918.2 | 0.032902 | -0.64426642 |
| NR_029423.1 | 0.033443 | -1.06385239 |
| NR_104331.1 | 0.034275 | 0.74721934  |
| NR_002724.2 | 0.034664 | 0.27761433  |
| NR_036569.1 | 0.034694 | 0.50066733  |
| NR_130317.1 | 0.035056 | 0.35703807  |
| NR_002798.1 | 0.035103 | 0.26892906  |
| NR_104463.1 | 0.035324 | 0.26415702  |
| NR_104122.1 | 0.035327 | 0.35088687  |
| NR_037591.1 | 0.035406 | -1.14577291 |
| NR_023351.2 | 0.036156 | 0.42626329  |
| NR_046335.1 | 0.036185 | -0.30033574 |
| NR_037667.1 | 0.03636  | -0.64260315 |
| NR_122031.1 | 0.03661  | 0.29335495  |
| NR_045818.1 | 0.036707 | -1.22807388 |
| NR_045672.1 | 0.037087 | -0.35494805 |
| NR_002796.2 | 0.03731  | 0.31493392  |
| NR_130728.1 | 0.038051 | 0.28017219  |
| NR_073155.1 | 0.038081 | -0.78017025 |
| NR_125360.1 | 0.038568 | 0.32881355  |
| NR_125337.1 | 0.038833 | -0.41879069 |
| NR_103826.1 | 0.039293 | -0.50286697 |
| NR_104020.1 | 0.039318 | -0.69470594 |
| NR_046333.1 | 0.03943  | 0.32596818  |
| NR_047690.1 | 0.039461 | 0.47174069  |
| NR_104292.1 | 0.039497 | 0.38167533  |
| NR_126502.1 | 0.039637 | 0.44360183  |
| NR_046331.1 | 0.040134 | 0.34435854  |
| NR_104200.1 | 0.040759 | 0.34790401  |
| NR_047582.1 | 0.040797 | -0.44619399 |

|             |          |             |
|-------------|----------|-------------|
| NR_110332.1 | 0.040942 | -0.59680116 |
| NR_033464.1 | 0.042353 | 0.57406821  |
| NR_028057.1 | 0.04241  | 0.28153949  |
| NR_030765.1 | 0.042492 | 0.29703078  |
| NR_037791.1 | 0.042645 | 0.30535607  |
| NR_026665.1 | 0.04269  | -0.72290565 |
| NR_104032.1 | 0.042845 | 1.02752725  |
| NR_036633.1 | 0.043129 | -0.61462516 |
| NR_036641.1 | 0.043165 | 0.52504602  |
| NR_037942.1 | 0.043437 | -0.59452487 |
| NR_073108.1 | 0.043438 | 0.7697725   |
| NR_046417.1 | 0.044123 | 0.43273914  |
| NR_030724.1 | 0.044277 | -0.41451022 |
| NR_027962.1 | 0.044457 | -0.99374101 |
| NR_023349.2 | 0.044777 | -0.56340308 |
| NR_038271.1 | 0.045948 | -0.36906346 |
| NR_003505.3 | 0.046258 | 0.33270224  |
| NR_120681.1 | 0.047044 | -0.69049628 |
| NR_026963.1 | 0.047379 | 0.24971244  |
| NR_073546.1 | 0.047517 | 0.32090289  |
| NR_027840.1 | 0.047612 | -0.66301799 |
| NR_003267.1 | 0.047971 | 0.25848361  |
| NR_109991.1 | 0.048288 | 0.2813425   |
| NR_003109.1 | 0.048772 | -0.42800143 |
| NR_103464.1 | 0.048903 | -0.5553307  |
| NR_027397.1 | 0.048924 | -0.59765669 |
| NR_046672.1 | 0.048983 | 0.34085956  |
| NR_027767.1 | 0.049295 | 0.60114625  |
| NR_073366.1 | 0.049529 | -0.57859708 |
| NR_024047.1 | 0.049871 | 0.31932883  |

**Supplementary Table 2. Differentially expressed coding genes between pCR and nCR**

| Gene symbol  | P.Value  | logFC       | Gene.title                                                            |
|--------------|----------|-------------|-----------------------------------------------------------------------|
| MPZL3        | 0.000102 | 0.67621743  | myelin protein zero like 3                                            |
| NSFL1C       | 0.000161 | 0.80677465  | NSFL1 cofactor                                                        |
| PTPN2        | 0.000169 | -0.96517728 | protein tyrosine phosphatase, non-receptor type 2                     |
| TTLL7        | 0.000279 | 1.05016167  | tubulin tyrosine ligase like 7                                        |
| CREB1        | 0.000293 | -1.0169655  | cAMP responsive element binding protein 1                             |
| FANCF        | 0.000301 | -0.95034838 | Fanconi anemia complementation group F                                |
| CEP44        | 0.000306 | 0.64175134  | centrosomal protein 44                                                |
| SAYSD1       | 0.000328 | 0.8428069   | SAYSVFN motif domain containing 1                                     |
| LOC389765    | 0.000341 | -1.33223042 | kinesin family member 27 pseudogene                                   |
| USP34        | 0.00038  | -1.23911822 | ubiquitin specific peptidase 34                                       |
| GLS          | 0.00038  | -0.96630802 | glutaminase                                                           |
| SLC2A4       | 0.000413 | 0.5377713   | solute carrier family 2 member 4                                      |
| LOC105371352 | 0.00043  | 0.478354    | uncharacterized LOC105371352                                          |
| PGGT1B       | 0.000762 | 1.11999862  | protein geranylgeranyltransferase type I subunit beta                 |
| HNRNPU       | 0.000894 | -1.23336074 | heterogeneous nuclear ribonucleoprotein U                             |
| SLC12A9      | 0.000922 | -1.26601107 | solute carrier family 12 member 9                                     |
| GS1-124K5.4  | 0.001185 | 0.63125241  | uncharacterized LOC100289098                                          |
| TCF3         | 0.001194 | -1.01317597 | transcription factor 3                                                |
| RALB         | 0.001254 | 0.61976104  | RALB Ras like proto-oncogene B                                        |
| CYB561       | 0.001371 | 0.57293509  | cytochrome b561                                                       |
| MAGI1        | 0.00138  | 0.5556342   | membrane associated guanylate kinase, WW and PDZ domain containing 1  |
| CDRT1        | 0.001445 | 0.58246033  | CMT1A duplicated region transcript 1                                  |
| SLC7A8       | 0.001448 | 0.73009006  | solute carrier family 7 member 8                                      |
| ANKRD12      | 0.001462 | -2.06275873 | ankyrin repeat domain 12                                              |
| SLC39A10     | 0.001547 | -1.15992914 | solute carrier family 39 member 10                                    |
| FOXN3        | 0.001561 | 0.68903409  | forkhead box N3                                                       |
| SNORD10      | 0.001575 | -0.64971186 | small nucleolar RNA, C/D box 10                                       |
| LINC00607    | 0.001646 | 0.66594521  | long intergenic non-protein coding RNA 607                            |
| DRAIC        | 0.001673 | 1.25818517  | downregulated RNA in cancer, inhibitor of cell invasion and migration |
| KCNJ2        | 0.001722 | -1.22291121 | potassium voltage-gated channel subfamily J member 2                  |
| EXD3         | 0.001728 | 0.44227907  | exonuclease 3'-5' domain containing 3                                 |
| KDM5A        | 0.001741 | 0.89087181  | lysine demethylase 5A                                                 |
| PPIAL4C      | 0.001742 | 0.54252167  | peptidylprolyl isomerase A like 4C                                    |
| NMNAT1       | 0.001765 | -0.58962268 | nicotinamide nucleotide adenyltransferase 1                           |
| AP2A2        | 0.001792 | 0.55529614  | adaptor related protein complex 2 alpha 2 subunit                     |
| LOC100631378 | 0.001888 | 0.67251655  | uncharacterized 100631378                                             |
| MUC4         | 0.001943 | 1.30765223  | mucin 4, cell surface associated                                      |
| PARP6        | 0.001965 | -0.72996651 | poly(ADP-ribose) polymerase family member 6                           |
| PSG11        | 0.002044 | 0.56196488  | pregnancy specific beta-1-glycoprotein 11                             |

|           |          |             |                                                                                                   |
|-----------|----------|-------------|---------------------------------------------------------------------------------------------------|
| LOC285178 | 0.0021   | 0.56448064  | uncharacterized LOC285178                                                                         |
| GPR101    | 0.002232 | 0.58524536  | G protein-coupled receptor 101                                                                    |
| ARID4B    | 0.002327 | -0.6229422  | AT-rich interaction domain 4B                                                                     |
| SQSTM1    | 0.00235  | 0.46078951  | sequestosome 1                                                                                    |
| MARK1     | 0.002623 | 1.03309076  | microtubule affinity regulating kinase 1                                                          |
| ACVR1B    | 0.002627 | 0.56597027  | activin A receptor type 1B                                                                        |
| GLDN      | 0.002628 | 0.45758731  | gliomedin                                                                                         |
| KCNK1     | 0.002689 | -0.9543384  | potassium two pore domain channel subfamily K member 1                                            |
| EPB41L5   | 0.002768 | -0.68800344 | erythrocyte membrane protein band 4.1 like 5                                                      |
| TMEM107   | 0.002858 | -1.5773623  | transmembrane protein 107                                                                         |
| PPP2R5E   | 0.002884 | -0.94135307 | protein phosphatase 2 regulatory subunit B'epsilon                                                |
| PHC3      | 0.00292  | 0.66912703  | polyhomeotic homolog 3                                                                            |
| CCDC154   | 0.002933 | 0.57484187  | coiled-coil domain containing 154                                                                 |
| SLC38A1   | 0.00297  | 0.60298275  | solute carrier family 38 member 1                                                                 |
| ZNF780A   | 0.003014 | -2.00588291 | zinc finger protein 780A                                                                          |
| FBXO42    | 0.003051 | 0.54830476  | F-box protein 42                                                                                  |
| SMARCB1   | 0.003076 | -0.95791751 | SWI/SNF related, matrix associated, actin dependent regulator of chromatin, subfamily b, member 1 |
| HRH1      | 0.003089 | 0.6575804   | histamine receptor H1                                                                             |
| EXPH5     | 0.003157 | 0.61700322  | exophilin 5                                                                                       |
| ACTR3C    | 0.003179 | 0.58554111  | ARP3 actin-related protein 3 homolog C                                                            |
| SLC2A12   | 0.003243 | 0.60631795  | solute carrier family 2 member 12                                                                 |
| RAP1GDS1  | 0.003244 | -0.95358695 | Rap1 GTPase-GDP dissociation stimulator 1                                                         |
| CASP7     | 0.003304 | -0.62313428 | caspase 7                                                                                         |
| GPR75     | 0.003306 | -0.79582434 | G protein-coupled receptor 75                                                                     |
| PIK3R1    | 0.003338 | -1.49761877 | phosphoinositide-3-kinase regulatory subunit 1                                                    |
| LOC283737 | 0.003418 | 0.5898756   | uncharacterized LOC283737                                                                         |
| CNST      | 0.003424 | -0.65764262 | consortin, connexin sorting protein                                                               |
| SFXN1     | 0.003454 | -0.64066823 | sideroflexin 1                                                                                    |
| AKT3      | 0.003528 | -0.4952383  | AKT serine/threonine kinase 3                                                                     |
| SNORA21   | 0.003545 | 0.96168848  | small nucleolar RNA, H/ACA box 21                                                                 |
| DSPP      | 0.003549 | 0.63425177  | dentin sialophosphoprotein                                                                        |
| MBNL3     | 0.00355  | 0.55945048  | muscleblind like splicing regulator 3                                                             |
| ITCH      | 0.003555 | 0.80037154  | itchy E3 ubiquitin protein ligase                                                                 |
| SDPR      | 0.003565 | 0.5261997   | serum deprivation response                                                                        |
| FLT1      | 0.003577 | 1.05704093  | fms related tyrosine kinase 1                                                                     |
| N4BP2L2   | 0.003644 | -1.18609692 | NEDD4 binding protein 2 like 2                                                                    |
| FOXJ1     | 0.003648 | 0.41675994  | forkhead box J1                                                                                   |
| COMMD10   | 0.003693 | 0.96129514  | COMM domain containing 10                                                                         |
| GGA2      | 0.003735 | -0.51083678 | golgi associated, gamma adaptin ear containing, ARF binding protein 2                             |
| SLC25A11  | 0.003764 | 1.48865305  | solute carrier family 25 member 11                                                                |
| TATDN3    | 0.003765 | -0.74567903 | TatD DNase domain containing 3                                                                    |
| ATP2A3    | 0.00386  | 0.86411966  | ATPase sarcoplasmic/endoplasmic reticulum Ca <sup>2+</sup> transporting 3                         |

|              |          |             |                                                               |
|--------------|----------|-------------|---------------------------------------------------------------|
| CYP19A1      | 0.003971 | 0.47958921  | cytochrome P450 family 19 subfamily A member 1                |
| TGIF2LY      | 0.003996 | 0.54346061  | TGFB induced factor homeobox 2 like, Y-linked                 |
| GPR161       | 0.00405  | -1.02000809 | G protein-coupled receptor 161                                |
| USP4         | 0.004117 | -0.72546575 | ubiquitin specific peptidase 4                                |
| TCAP         | 0.004137 | 0.43613776  | titin-cap                                                     |
| SLC44A1      | 0.004152 | -0.83164799 | solute carrier family 44 member 1                             |
| EIF4EBP2     | 0.004194 | 0.92015341  | eukaryotic translation initiation factor 4E binding protein 2 |
| TMEM248      | 0.004262 | -0.6153004  | transmembrane protein 248                                     |
| GMPPA        | 0.0043   | -0.41878904 | GDP-mannose pyrophosphorylase A                               |
| MME          | 0.004317 | 0.56741649  | membrane metallo-endopeptidase                                |
| CEACAM21     | 0.004371 | 0.41040542  | carcinoembryonic antigen related cell adhesion molecule 21    |
| NAT2         | 0.004402 | 0.47994117  | N-acetyltransferase 2                                         |
| PCNX3        | 0.004445 | 0.5972109   | pecanex homolog 3 (Drosophila)                                |
| GJD3         | 0.004463 | 0.51886215  | gap junction protein delta 3                                  |
| RFX2         | 0.004515 | 0.46407575  | regulatory factor X2                                          |
| TNS4         | 0.00459  | 0.57035243  | tensin 4                                                      |
| NADK         | 0.004611 | -0.67146245 | NAD kinase                                                    |
| FOXH1        | 0.004652 | -1.1414079  | forkhead box H1                                               |
| ARSK         | 0.004657 | 0.48165728  | arylsulfatase family member K                                 |
| TRIM25       | 0.004662 | 0.47687143  | tripartite motif containing 25                                |
| RNF126       | 0.004695 | 0.42382251  | ring finger protein 126                                       |
| HNRNPCL4     | 0.004782 | 0.36135699  | heterogeneous nuclear ribonucleoprotein C-like 4              |
| SLC16A5      | 0.004802 | 0.56630724  | solute carrier family 16 member 5                             |
| GDE1         | 0.00481  | -0.87342905 | glycerophosphodiester phosphodiesterase 1                     |
| SLC19A3      | 0.004814 | 0.62420624  | solute carrier family 19 member 3                             |
| DNAJB13      | 0.004825 | 0.49077523  | DnaJ heat shock protein family (Hsp40) member B13             |
| DICER1       | 0.004866 | 0.56644252  | dicer 1, ribonuclease III                                     |
| C7orf43      | 0.004947 | -0.42041484 | chromosome 7 open reading frame 43                            |
| TRIM16L      | 0.004962 | 0.99839951  | uncharacterized LOC101930303                                  |
| CDC20B       | 0.005086 | 1.17196393  | cell division cycle 20B                                       |
| SDK2         | 0.005116 | 0.46408752  | sidekick cell adhesion molecule 2                             |
| CNPY3        | 0.005125 | -0.60314706 | canopy FGF signaling regulator 3                              |
| LOC101928730 | 0.00514  | 0.45282751  | uncharacterized LOC101928730                                  |
| FAM178B      | 0.00522  | 0.34314013  | family with sequence similarity 178 member B                  |
| PARD3B       | 0.005292 | 0.53106292  | par-3 family cell polarity regulator beta                     |
| TMPRSS12     | 0.005333 | 1.07855264  | transmembrane protease, serine 12                             |
| CDYL2        | 0.00535  | 0.97091013  | chromodomain Y-like 2                                         |
| BACH2        | 0.005353 | 0.68887252  | BTB domain and CNC homolog 2                                  |
| RBM4         | 0.005381 | -0.83141664 | RBM14-RBM4 readthrough/                                       |
| PDCD2        | 0.0054   | 0.62236352  | programmed cell death 2                                       |
| TANK         | 0.005441 | -0.97792417 | TRAF family member associated NFKB activator                  |
| IGH          | 0.005457 | 0.74647365  | immunoglobulin heavy locus                                    |
| HIST1H3F     | 0.005462 | -0.87271991 | histone cluster 1, H3f                                        |

|              |          |             |                                                        |
|--------------|----------|-------------|--------------------------------------------------------|
| LOC101929872 | 0.005463 | 0.54129319  | uncharacterized LOC101929872                           |
| FCHO1        | 0.005523 | 0.37452593  | FCH domain only 1                                      |
| LILRA2       | 0.005553 | 0.79075299  | leukocyte immunoglobulin like receptor A2              |
| MYCBP        | 0.005578 | 0.99452232  | GJA9-MYCBP readthrough                                 |
| RAB28        | 0.005598 | -0.47040542 | RAB28, member RAS oncogene family                      |
| RASAL1       | 0.005642 | 0.46951657  | RAS protein activator like 1                           |
| THRA         | 0.00568  | 0.43863612  | thyroid hormone receptor, alpha                        |
| ALMS1        | 0.005711 | -0.96666562 | ALMS1, centrosome and basal body associated protein    |
| FTSJ1        | 0.005774 | 0.60171195  | FtsJ RNA methyltransferase homolog 1 (E. coli)         |
| HOXB5        | 0.005815 | 0.51606912  | homeobox B5                                            |
| CCDC181      | 0.005891 | 0.46741429  | coiled-coil domain containing 181                      |
| RUNX2        | 0.005974 | 1.51743317  | runt related transcription factor 2                    |
| COX15        | 0.00598  | 0.52252235  | COX15, cytochrome c oxidase assembly homolog           |
| CNOT7        | 0.006025 | -0.556832   | CCR4-NOT transcription complex subunit 7               |
| SATB1        | 0.006044 | 0.64876156  | SATB homeobox 1                                        |
| KIAA1211L    | 0.006045 | 0.4258144   | KIAA1211 like                                          |
| ZNF282       | 0.006055 | 0.4828297   | zinc finger protein 282                                |
| HIP1         | 0.00607  | 0.59031717  | huntingtin interacting protein 1                       |
| JKAMP        | 0.006089 | -0.8458754  | JNK1/MAPK8-associated membrane protein                 |
| CACNB2       | 0.006103 | -1.17121657 | calcium voltage-gated channel auxiliary subunit beta 2 |
| LOC153577    | 0.006125 | 0.44786223  | uncharacterized LOC153577                              |
| KIRREL       | 0.006166 | -1.37329508 | kin of IRRE like (Drosophila)                          |
| PRRC2C       | 0.006202 | -0.67624385 | proline rich coiled-coil 2C                            |
| CDH24        | 0.006222 | 0.84979927  | cadherin 24                                            |
| SMC2         | 0.006356 | 0.75363945  | structural maintenance of chromosomes 2                |
| SPOP         | 0.00637  | 0.4330572   | speckle type BTB/POZ protein                           |
| OSBP2        | 0.006385 | 0.38343846  | oxysterol binding protein 2                            |
| APOE         | 0.006404 | 0.61946475  | apolipoprotein E                                       |
| SS18         | 0.006415 | -0.82872114 | SS18, nBAF chromatin remodeling complex subunit        |
| CD1B         | 0.006419 | 0.52748822  | CD1b molecule                                          |
| CCDC117      | 0.006509 | -0.85703975 | coiled-coil domain containing 117                      |
| MRPS11       | 0.00652  | 0.60593581  | mitochondrial ribosomal protein S11                    |
| ANK3         | 0.006554 | 0.81205404  | ankyrin 3, node of Ranvier (ankyrin G)                 |
| ZNF621       | 0.006594 | -0.9358599  | zinc finger protein 621                                |
| STS          | 0.006631 | 0.52980355  | steroid sulfatase (microsomal), isozyme S              |
| NBN          | 0.006632 | -0.92168976 | nibrin                                                 |
| METTL23      | 0.006702 | -0.80019922 | methyltransferase like 23                              |
| TIA1         | 0.006725 | -0.78453399 | TIA1 cytotoxic granule-associated RNA binding protein  |
| IL31RA       | 0.006765 | 0.39085712  | interleukin 31 receptor A                              |
| WDR86        | 0.006796 | 0.63000788  | WD repeat domain 86                                    |
| ABL2         | 0.006824 | 0.48839208  | ABL proto-oncogene 2, non-receptor tyrosine kinase     |
| DUSP18       | 0.006831 | 0.51802291  | dual specificity phosphatase 18                        |
| TARBP1       | 0.006835 | -0.87983277 | TAR (HIV-1) RNA binding protein 1                      |



|              |          |             |                                                           |
|--------------|----------|-------------|-----------------------------------------------------------|
| OLFM2        | 0.006875 | 0.87301125  | olfactomedin 2                                            |
| PPID         | 0.006882 | -0.63927924 | peptidylprolyl isomerase D                                |
| MON2         | 0.006969 | -0.97150867 | MON2 homolog, regulator of endosome-to-Golgi trafficking  |
| KITLG        | 0.00698  | 0.52950798  | KIT ligand                                                |
| CCDC97       | 0.006989 | 0.43863584  | coiled-coil domain containing 97                          |
| SLC35B4      | 0.007005 | 0.48957451  | solute carrier family 35 member B4                        |
| ZNF37BP      | 0.007007 | -1.12723671 | zinc finger protein 37B, pseudogene                       |
| CMKLR1       | 0.007133 | 0.30949928  | chemerin chemokine-like receptor 1                        |
| NCOA7        | 0.007147 | -0.58680766 | nuclear receptor coactivator 7                            |
| THEM4        | 0.007161 | -0.78366598 | thioesterase superfamily member 4                         |
| LOC105374366 | 0.007176 | 0.53722123  | uncharacterized LOC105374366                              |
| LMLN         | 0.007234 | 0.57104923  | leishmanolysin like peptidase                             |
| UBE3B        | 0.007249 | 0.49538533  | ubiquitin protein ligase E3B                              |
| PNPLA3       | 0.007294 | 0.46721752  | patatin like phospholipase domain containing 3            |
| PLB1         | 0.0073   | 0.50173325  | phospholipase B1                                          |
| MTDH         | 0.0074   | -1.34435864 | metadherin                                                |
| SON          | 0.007482 | -0.61042855 | SON DNA binding protein                                   |
| ADAM32       | 0.007495 | 0.6462346   | ADAM metallopeptidase domain 32                           |
| RORC         | 0.007539 | 0.43788254  | RAR related orphan receptor C                             |
| ALKBH8       | 0.007575 | -0.51690241 | alkB homolog 8, tRNA methyltransferase                    |
| GSE1         | 0.007657 | 0.71025944  | Gse1 coiled-coil protein                                  |
| ELMO2        | 0.007756 | -0.40722864 | engulfment and cell motility 2                            |
| LOC285095    | 0.007759 | 0.36888923  | uncharacterized LOC285095                                 |
| SPEN         | 0.007771 | -0.82806585 | spen family transcriptional repressor                     |
| TCF20        | 0.00781  | -0.78870464 | transcription factor 20                                   |
| ANO7         | 0.007835 | 1.20850661  | anoctamin 7                                               |
| SNRK         | 0.007859 | 0.51991495  | SNF related kinase                                        |
| ZBTB38       | 0.007953 | 0.66207558  | zinc finger and BTB domain containing 38                  |
| CERK         | 0.007976 | -0.48550195 | ceramide kinase                                           |
| SLC30A5      | 0.008074 | -0.67169739 | solute carrier family 30 member 5                         |
| PWAR5        | 0.008083 | -0.95621519 | Prader Willi/Angelman region RNA 5                        |
| PATL1        | 0.008095 | -0.60294863 | PAT1 homolog 1, processing body mRNA decay factor         |
| CEACAM6      | 0.008112 | 1.96607951  | carcinoembryonic antigen related cell adhesion molecule 6 |
| MAFK         | 0.008146 | 0.51912763  | MAF bZIP transcription factor K                           |
| CCNG2        | 0.008158 | 0.6221167   | cyclin G2                                                 |
| GON4L        | 0.00818  | -0.88975378 | gon-4 like                                                |
| TIAF1        | 0.008227 | -0.56950185 | TGFB1-induced anti-apoptotic factor 1                     |
| DKFZp564H213 | 0.008244 | -0.55143431 | uncharacterized LOC440432                                 |
| SDHAF4       | 0.008285 | 0.72372921  | succinate dehydrogenase complex assembly factor 4         |
| PTP4A3       | 0.008324 | -1.32105187 | protein tyrosine phosphatase type IVA, member 3           |
| DDX11        | 0.008335 | -1.09003919 | DEAD/H-box helicase 11                                    |
| ZNF385A      | 0.008371 | 0.61365913  | zinc finger protein 385A                                  |
| LOC730961    | 0.0084   | 0.33946497  | uncharacterized LOC730961                                 |

|              |          |             |                                                                      |
|--------------|----------|-------------|----------------------------------------------------------------------|
| LCA5L        | 0.008408 | 0.47347349  | LCA5L, lebercilin like                                               |
| PPM1K        | 0.008417 | -0.96368551 | protein phosphatase, Mg <sup>2+</sup> /Mn <sup>2+</sup> dependent 1K |
| LUC7L2       | 0.008443 | -0.90287228 | C7orf55-LUC7L2 readthrough                                           |
| MAT2A        | 0.008495 | -0.7337722  | methionine adenosyltransferase 2A                                    |
| C9orf3       | 0.008511 | -0.43160019 | chromosome 9 open reading frame 3                                    |
| RAB5A        | 0.008531 | 0.974627    | RAB5A, member RAS oncogene family                                    |
| RNF115       | 0.008547 | -0.78286567 | ring finger protein 115                                              |
| NAGPA        | 0.008606 | 0.47584603  | N-acetylglucosamine-1-phosphodiester alpha-N-acetylglucosaminidase   |
| UNK          | 0.008636 | -0.60379696 | unkempt family zinc finger                                           |
| GRIP1        | 0.008652 | -0.96439627 | glutamate receptor interacting protein 1                             |
| ARID2        | 0.008657 | -0.70201683 | AT-rich interaction domain 2                                         |
| EIF2AK4      | 0.008674 | -0.98926599 | eukaryotic translation initiation factor 2 alpha kinase 4            |
| DCC          | 0.008785 | 0.33229198  | DCC netrin 1 receptor                                                |
| MXD4         | 0.008818 | 0.53819527  | MAX dimerization protein 4                                           |
| ZC3H14       | 0.008851 | -1.03057581 | zinc finger CCCH-type containing 14                                  |
| AP3M1        | 0.008862 | 0.4562984   | adaptor related protein complex 3 mu 1 subunit                       |
| M6PR         | 0.008944 | -1.09755415 | mannose-6-phosphate receptor, cation dependent                       |
| LOC101930415 | 0.009    | -0.90555283 | uncharacterized LOC101930415                                         |
| LMX1B        | 0.009045 | 0.3686186   | LIM homeobox transcription factor 1 beta                             |
| MCTP1        | 0.009117 | 0.77457338  | multiple C2 and transmembrane domain containing 1                    |
| MKNK1        | 0.009124 | 0.77804391  | MAP kinase interacting serine/threonine kinase 1                     |
| THUMPD1      | 0.009194 | -0.62111673 | THUMP domain containing 1                                            |
| ZNF641       | 0.009201 | -0.87671588 | zinc finger protein 641                                              |
| RAB3IL1      | 0.009225 | 0.47271049  | RAB3A interacting protein like 1                                     |
| TPSG1        | 0.009248 | 0.39978085  | tryptase gamma 1                                                     |
| ZFHX3        | 0.009297 | 0.87783293  | zinc finger homeobox 3                                               |
| GLIPR1       | 0.009319 | 0.78873007  | GLI pathogenesis related 1                                           |
| MMD          | 0.009343 | 0.44725569  | monocyte to macrophage differentiation associated                    |
| PSG4         | 0.009407 | 0.37978358  | pregnancy specific beta-1-glycoprotein 4                             |
| MED25        | 0.009477 | -0.7835693  | mediator complex subunit 25                                          |
| TRIP12       | 0.009528 | -0.5751403  | thyroid hormone receptor interactor 12                               |
| ACTN2        | 0.009561 | 0.42981852  | actin alpha 2                                                        |
| NEU1         | 0.009707 | 0.50370338  | neuraminidase 1 (lysosomal sialidase)                                |
| ASXL3        | 0.009738 | 0.58816344  | additional sex combs like 3, transcriptional regulator               |
| NRGN         | 0.009825 | 0.42204144  | neurogranin                                                          |
| PGM5         | 0.009924 | 0.30349646  | phosphoglucomutase 5                                                 |
| DBT          | 0.009939 | -0.53422517 | dihydrolipoamide branched chain transacylase E2                      |
| PBX2         | 0.009942 | -0.78443439 | PBX homeobox 2                                                       |
| GPATCH2      | 0.009949 | -0.78806239 | G-patch domain containing 2                                          |
| TIMM23       | 0.009962 | -0.9433154  | translocase of inner mitochondrial membrane 23                       |
